# Supplementary material for: Reactions of PhIX 2 I( iii ) oxidants with heavy triphenyl pnictines
Source: Royal Society of Chemistry journal article supplement (doi:10.1039/d0dt00777c), 2020-01-01

Supporting Information For:

**Reactions of PhIX<sub>2</sub> I(III) oxidants with heavy triphenyl pnictines**

*Sathsara Egalahewa, Antonino Aprile, and Jason L. Dutton\**

Department of Chemistry and Physics, La Trobe Institute for Molecular Science, La Trobe  
University, Melbourne, Victoria, Australia, 3086

### Compound 7-<sup>1</sup>H NMR

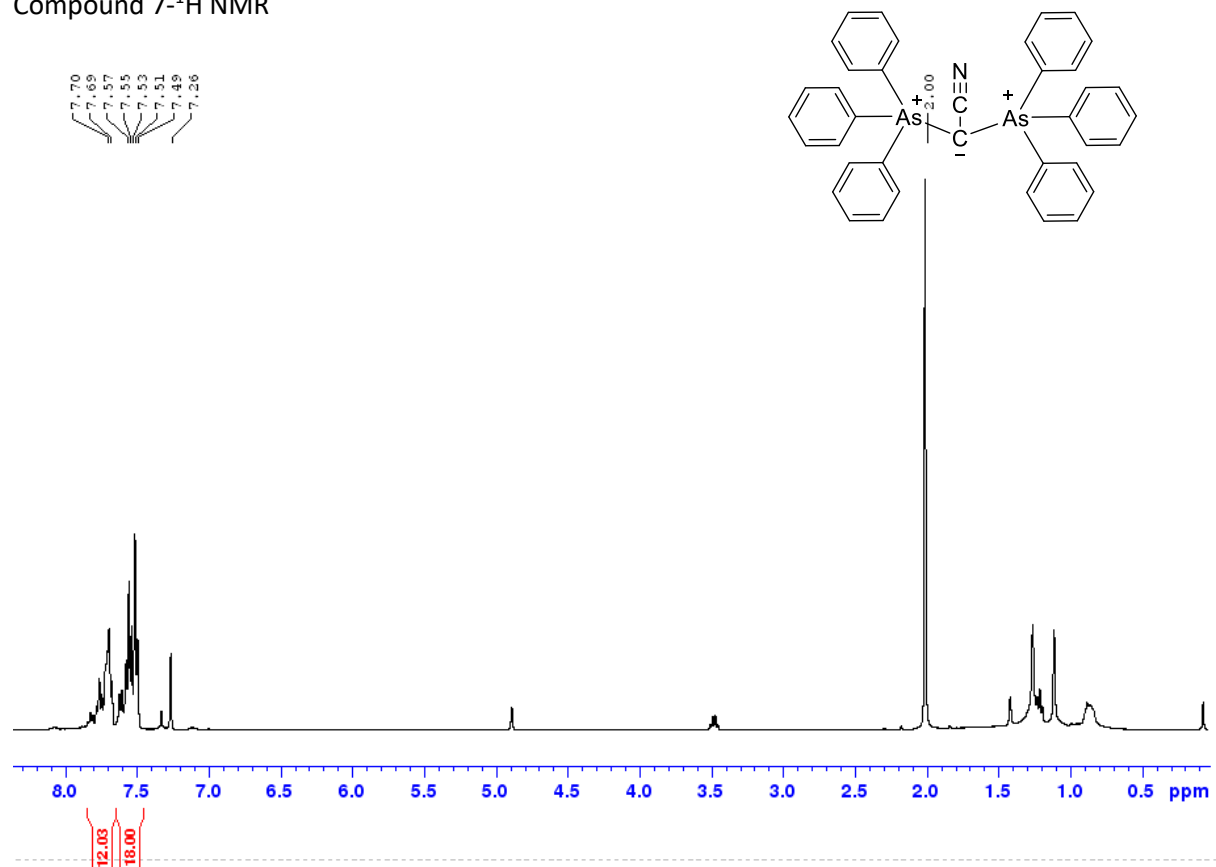

### Compound 7-<sup>19</sup>F NMR

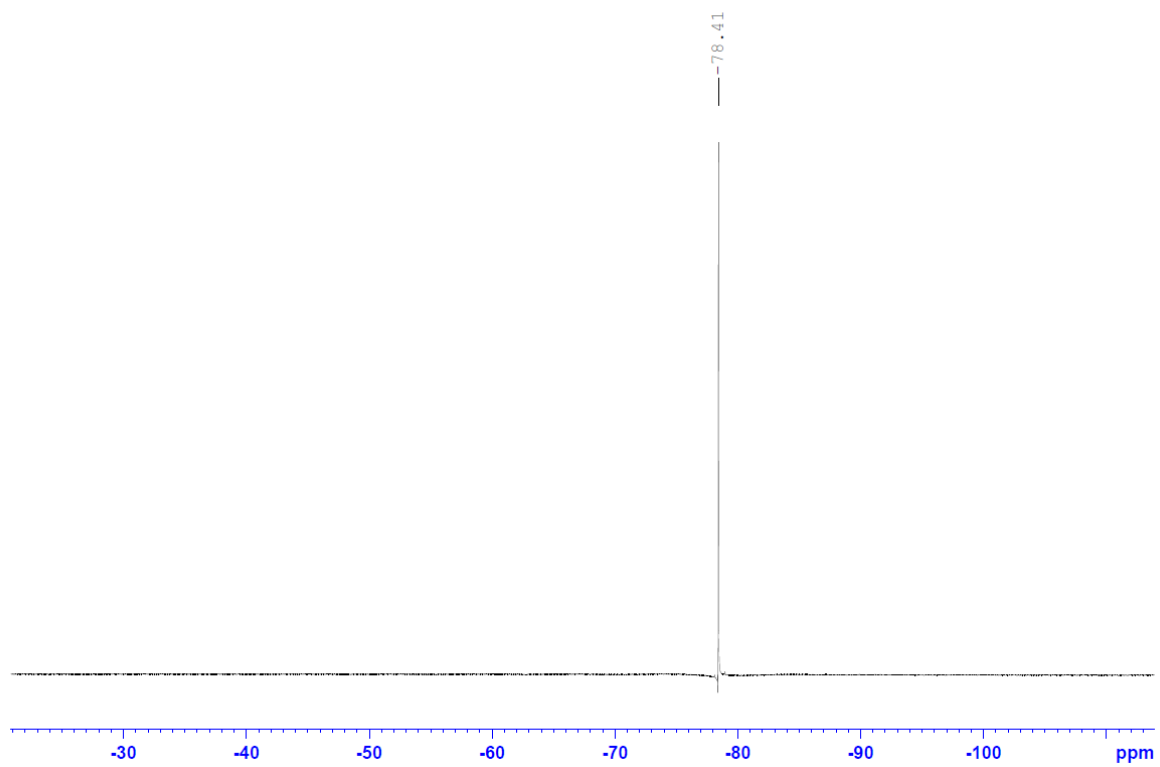

Compound 8 – <sup>1</sup>H NMR

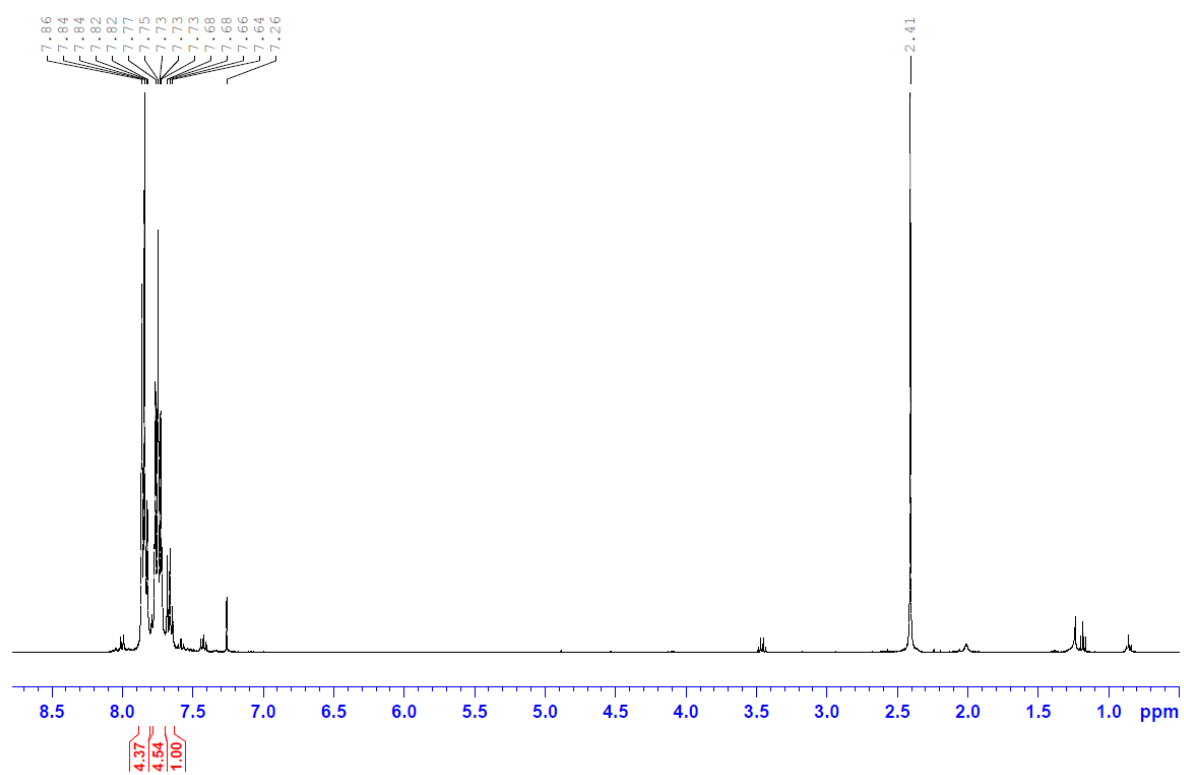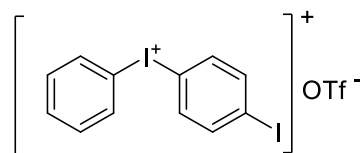

Compound 8- <sup>19</sup>F NMR

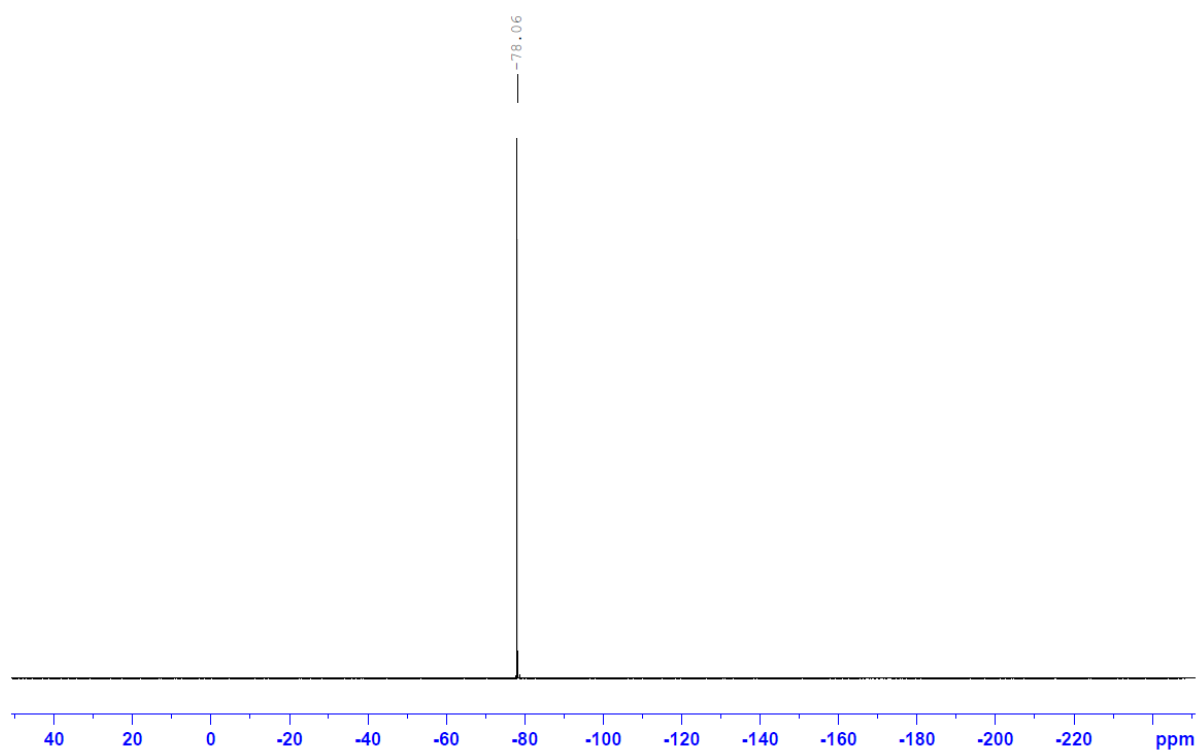

Compound 9- <sup>1</sup>H NMR

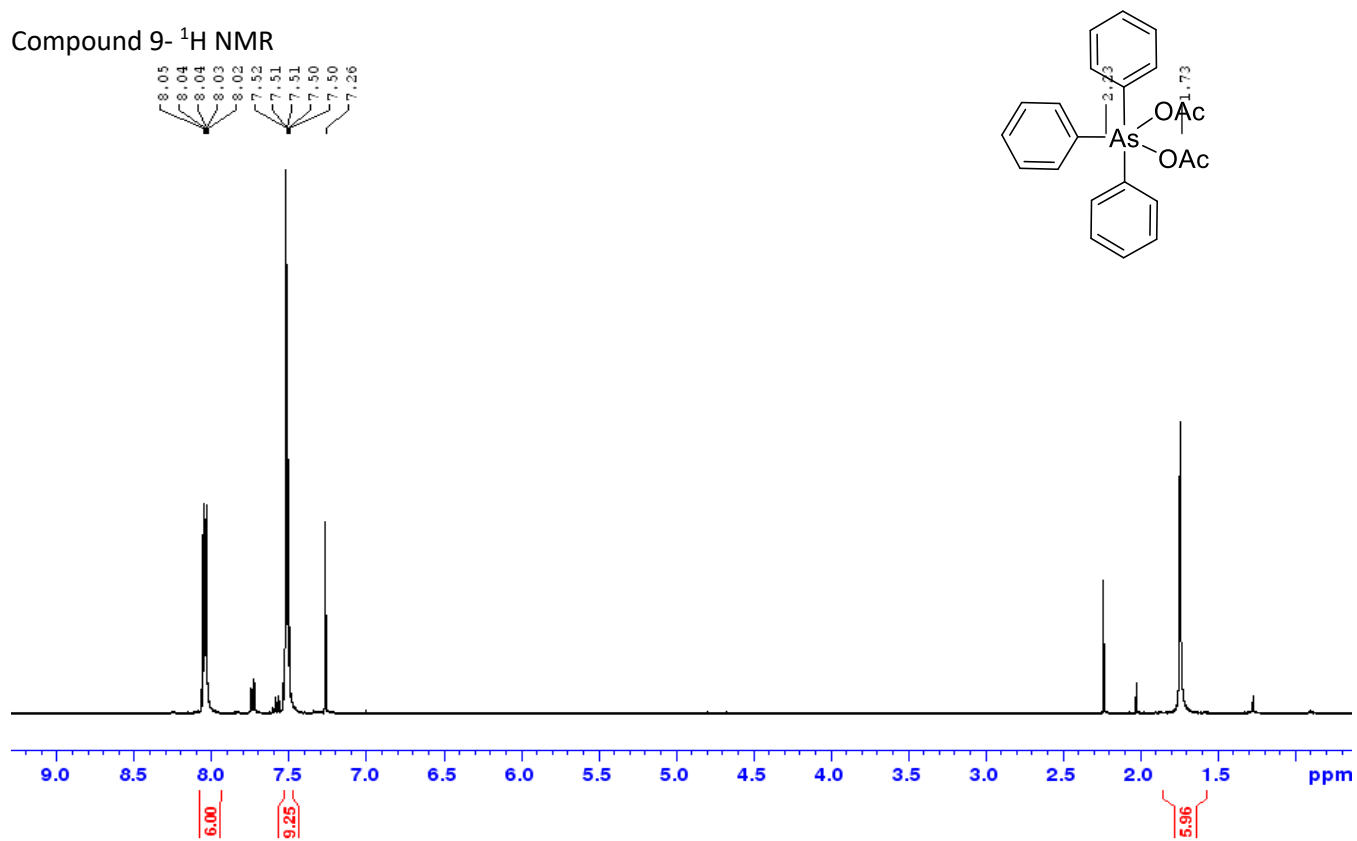

Compound 10- <sup>1</sup>H NMR

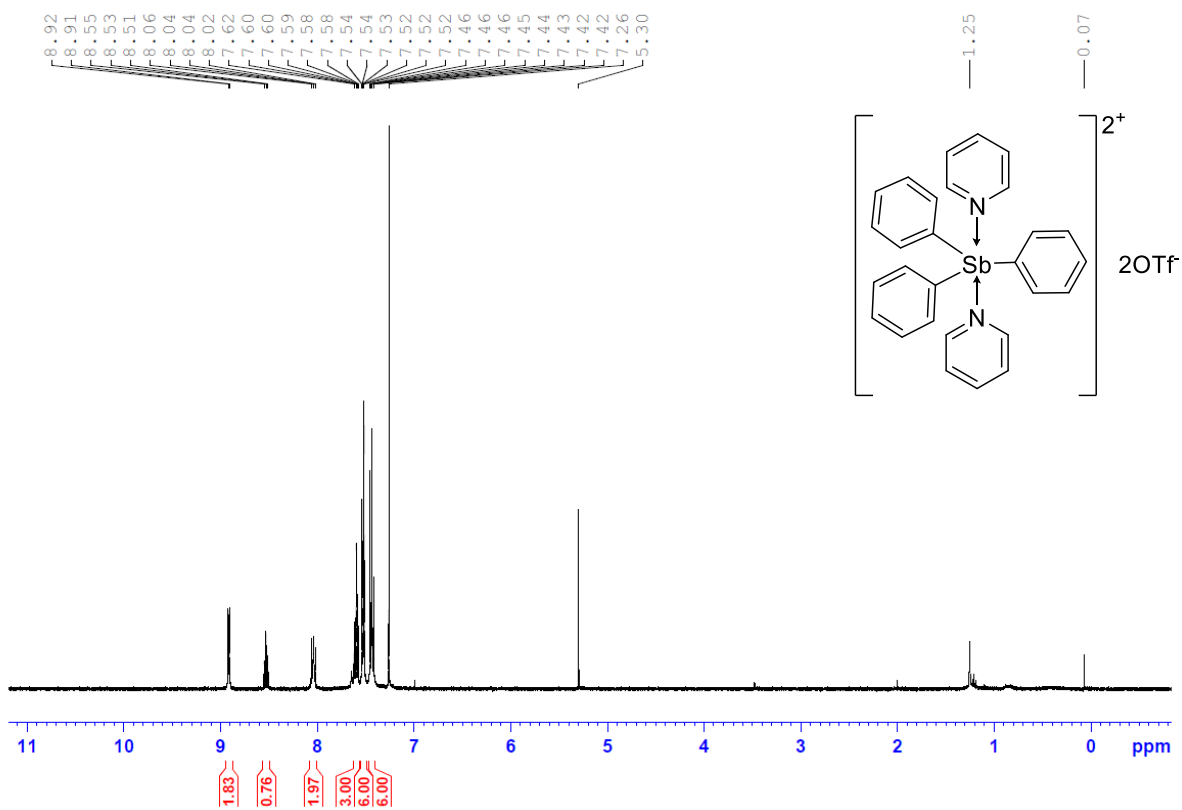

Compound 10- <sup>19</sup>F NMR

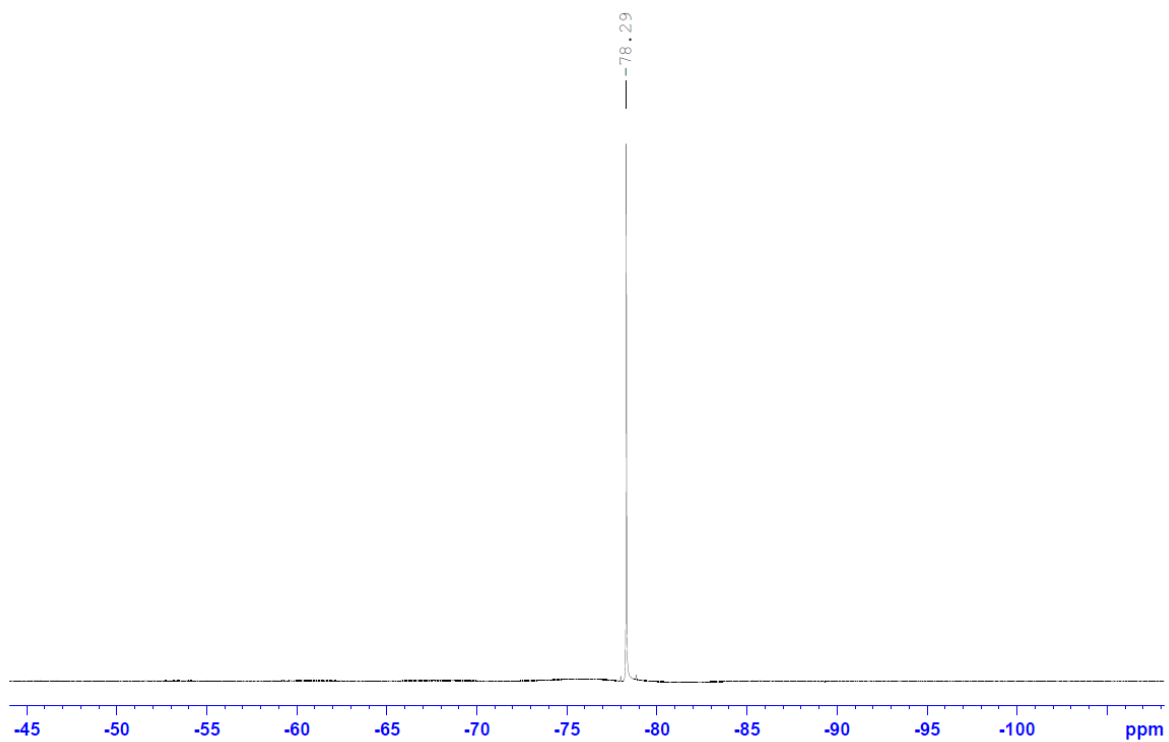

Compound 10- <sup>13</sup>C NMR

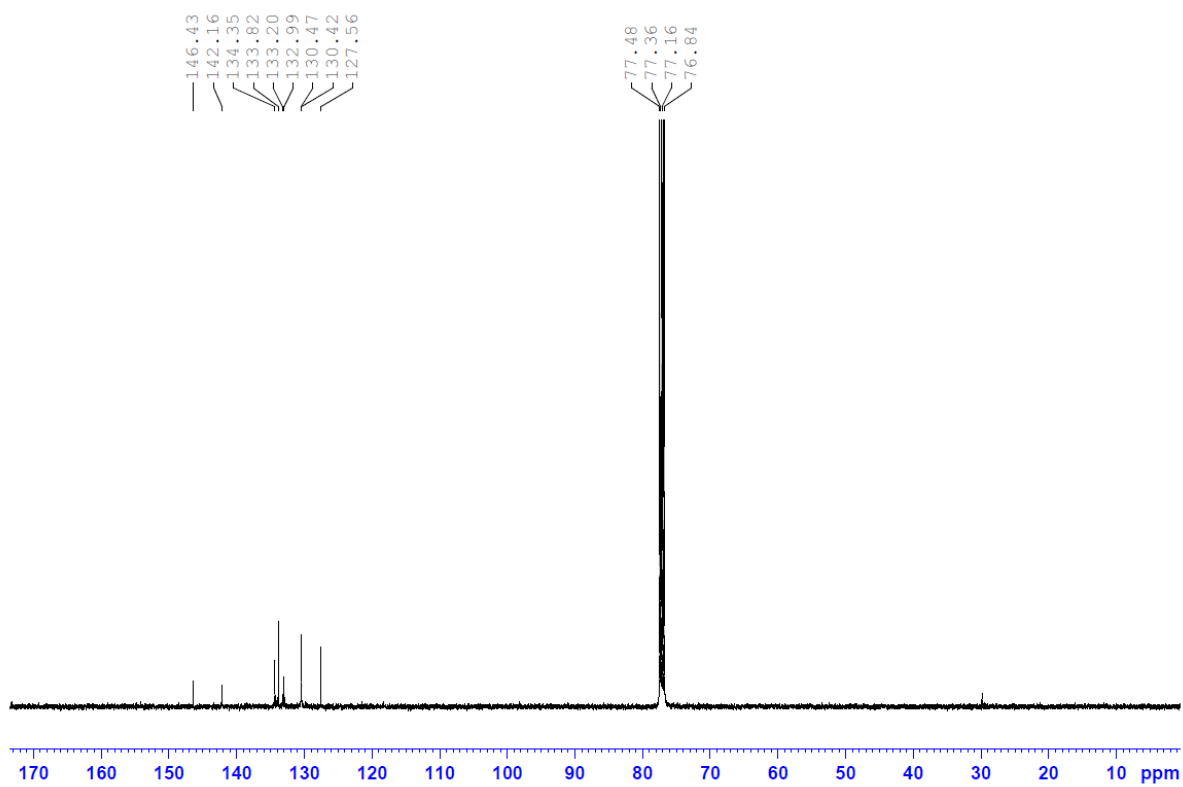

Compound 11- <sup>1</sup>H NMR

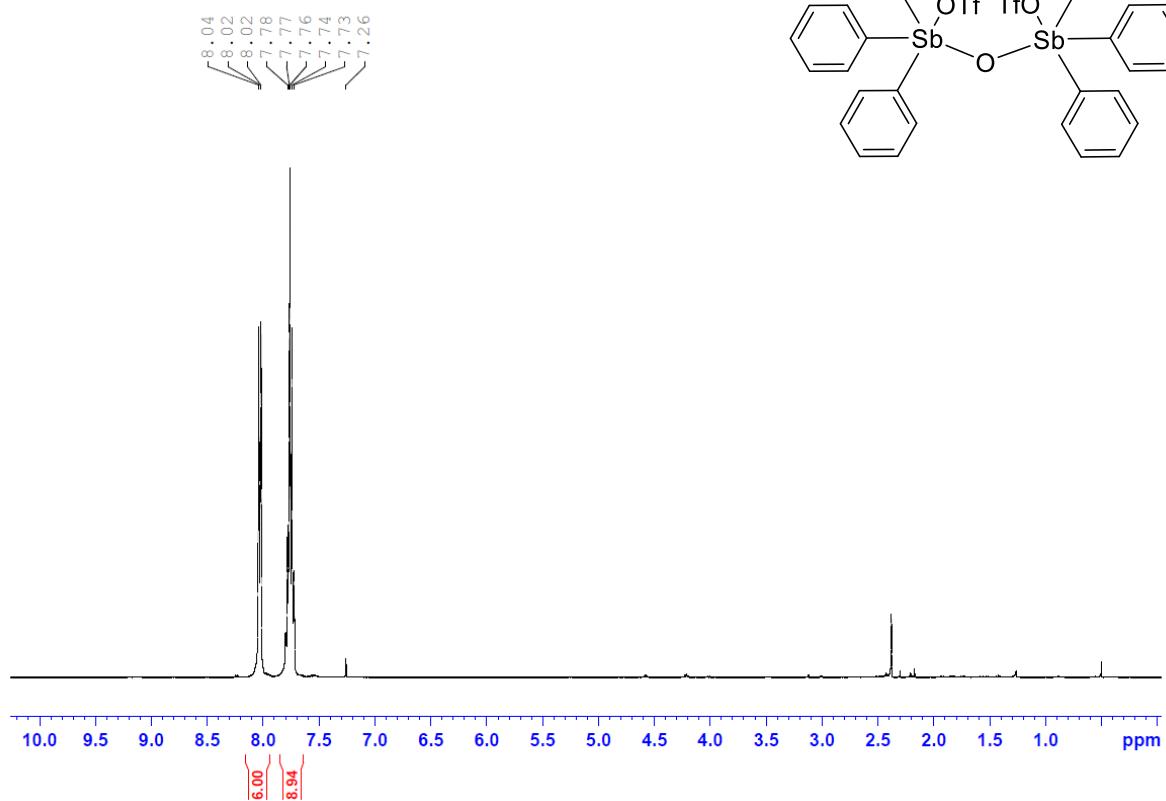

Compound 11- <sup>19</sup>F NMR

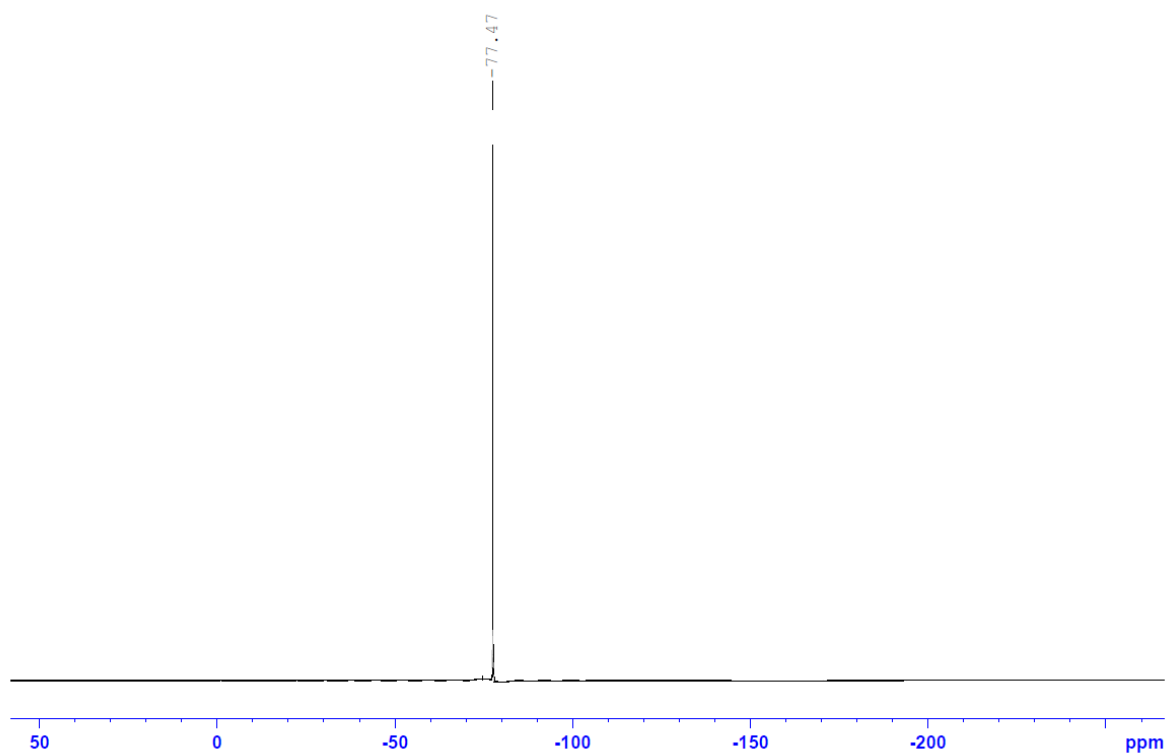

Compound 12-  $^1\text{H}$  NMR, in situ reaction mixture

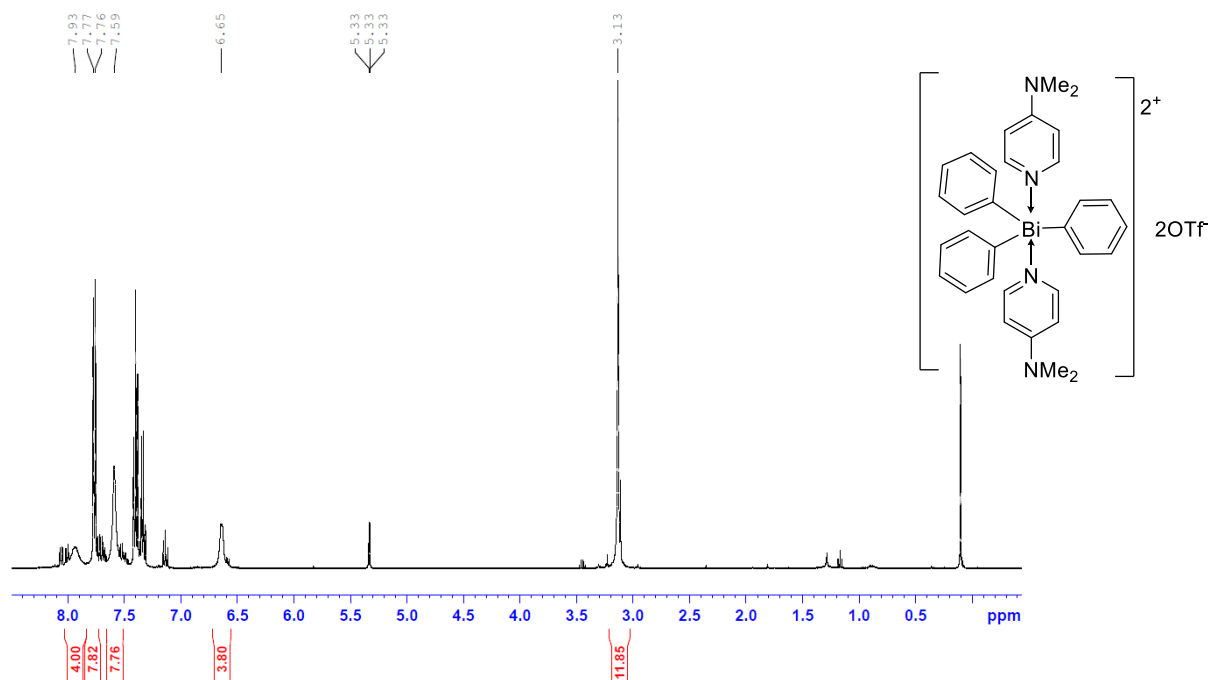

Compound 12-  $^{19}\text{F}$  NMR

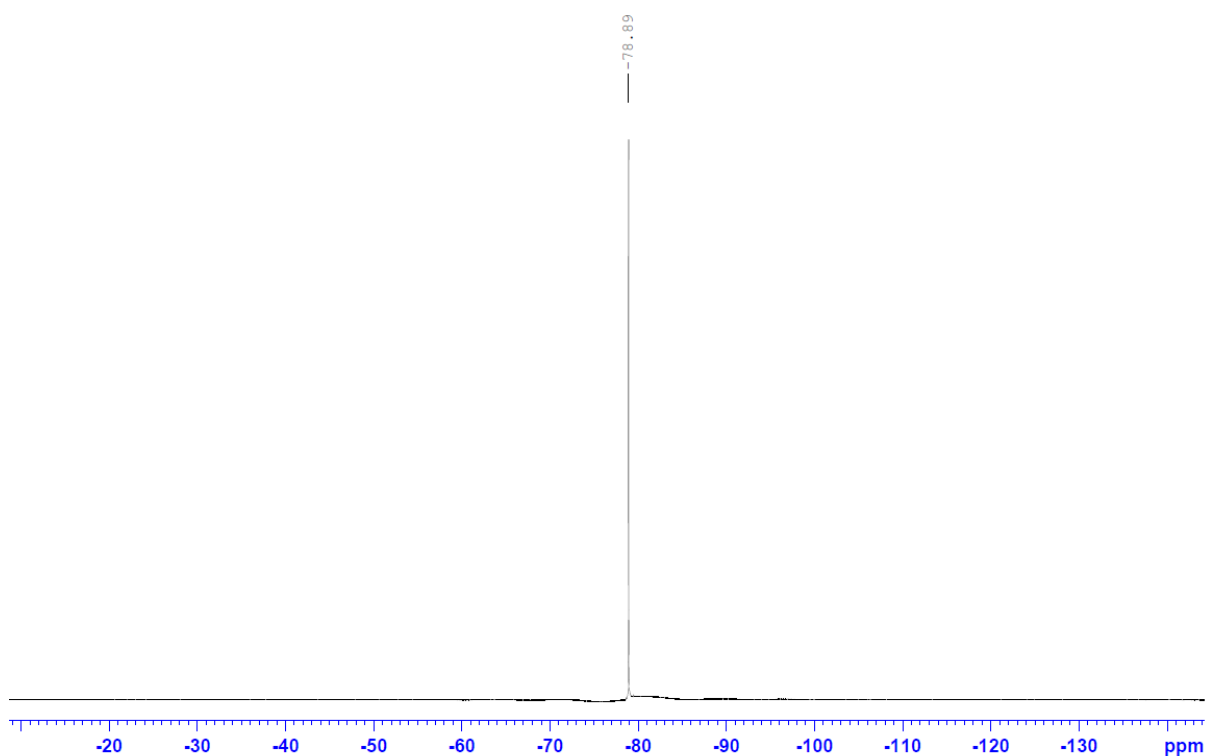

Compound 13-  $^1\text{H}$  NMR

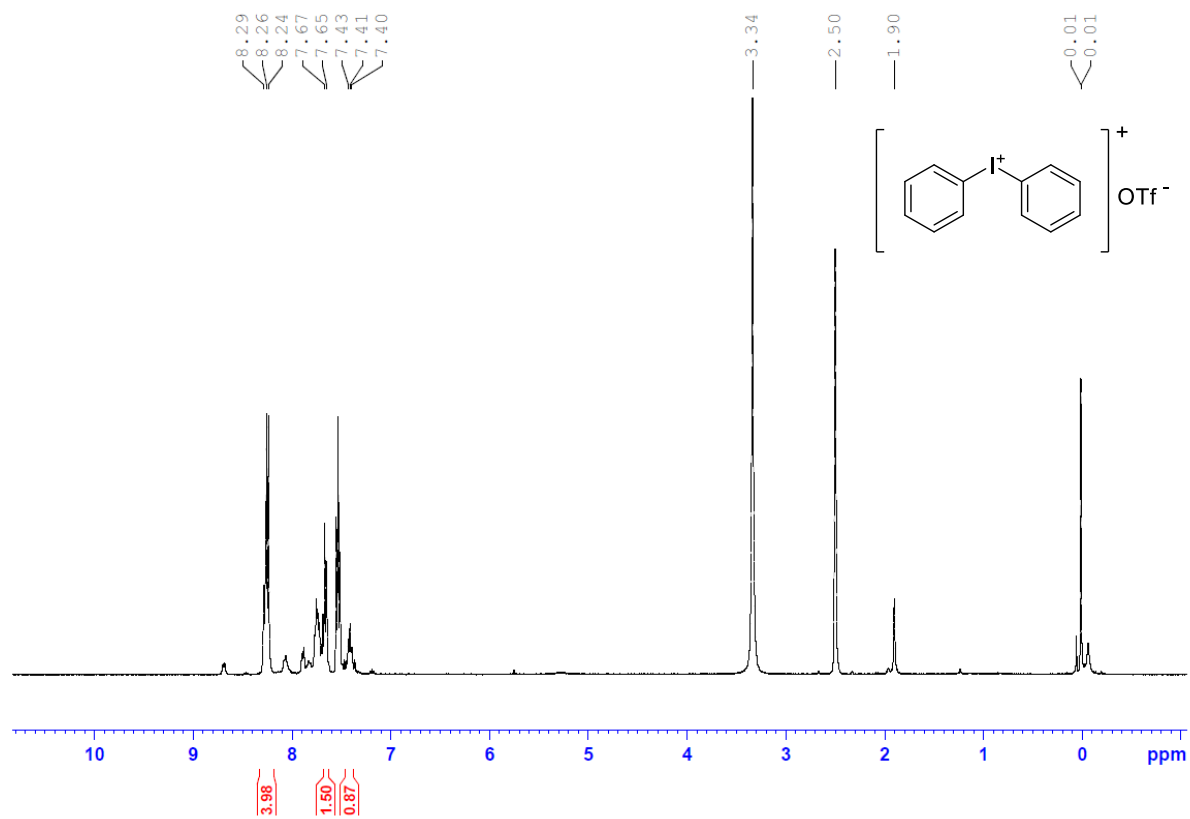

Compound 13-  $^{19}\text{F}$  NMR

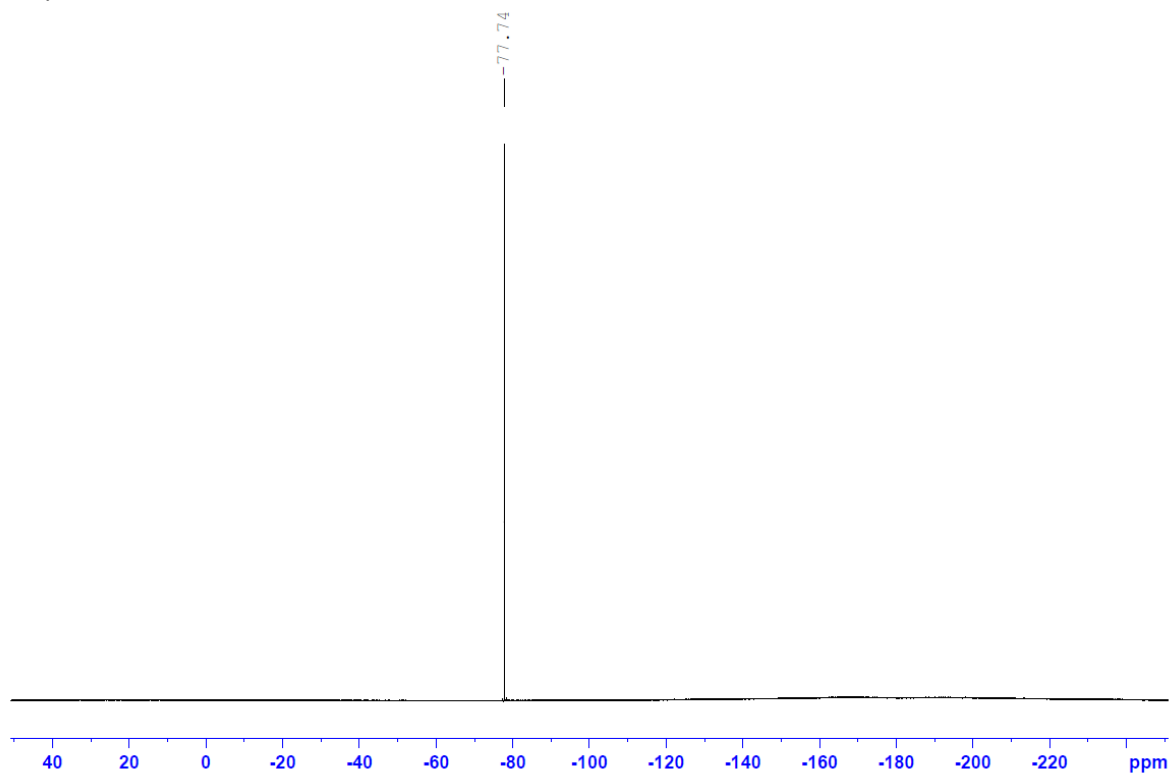

Supplement: d0dt00777c1.pdf [file d0dt00777c1.pdf]
